# Supplementary figures and images for: Local IFNα enhances the anti-tumoral efficacy of systemic anti-PD1 to prevent tumor relapse
Source: PubMed Central journal article supplement — J Immunother Cancer. 2020 Nov 25;8(2):e000996. doi: 10.1136/jitc-2020-000996 (PMC7689071; doi:10.1136/jitc-2020-000996), 2020-11-25

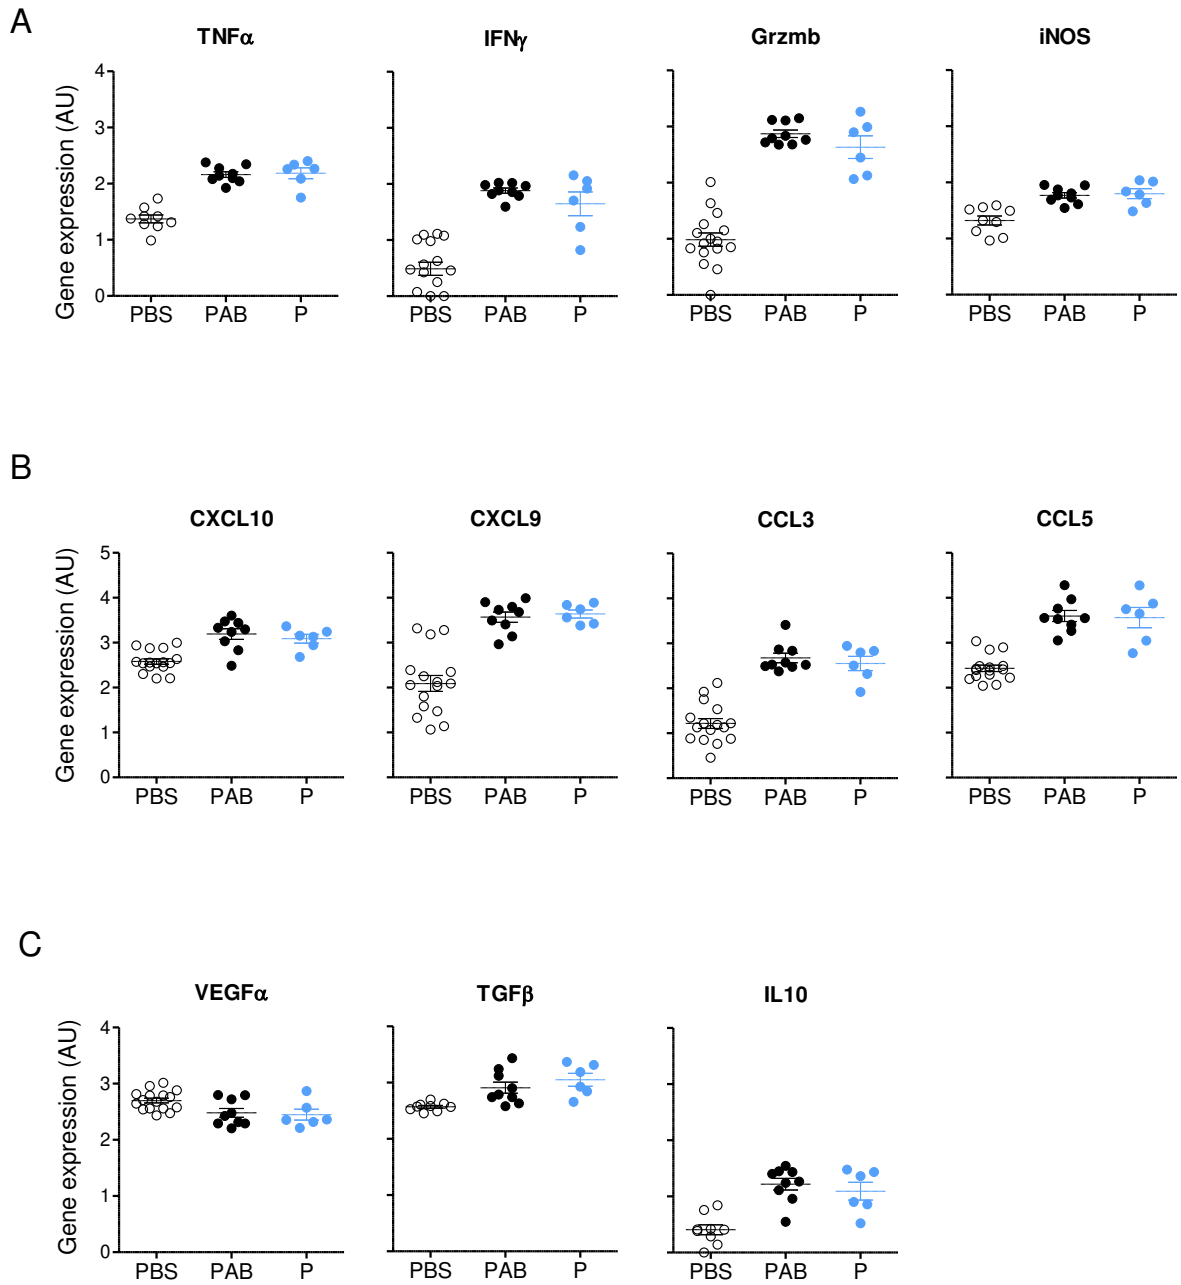

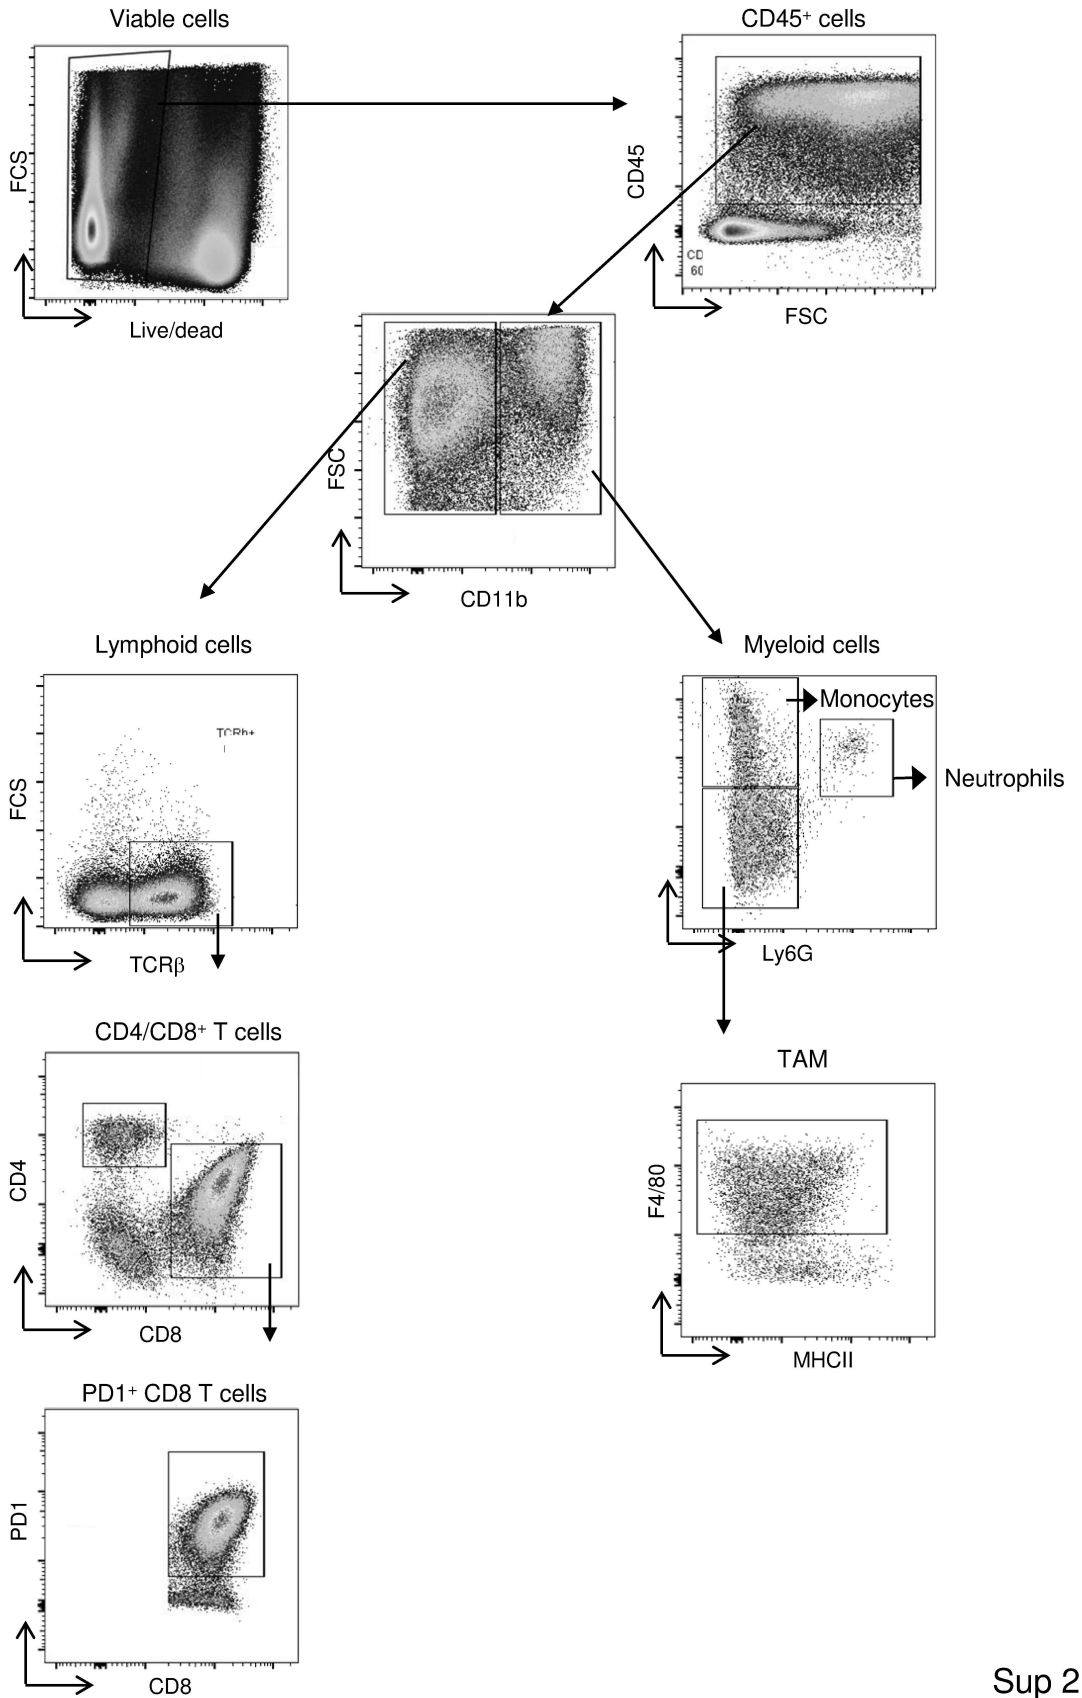

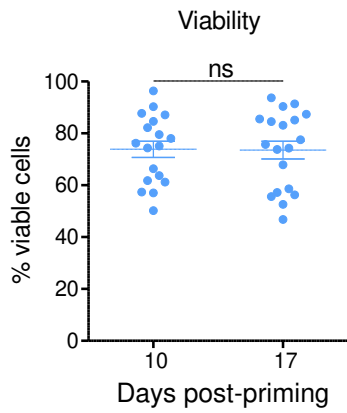

A

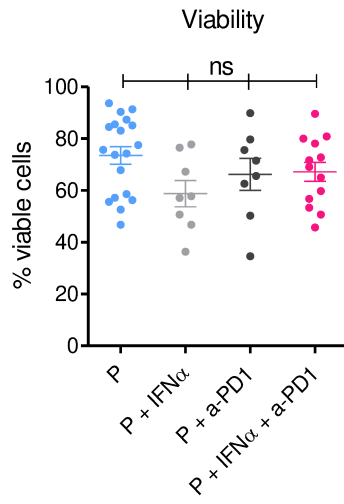

B

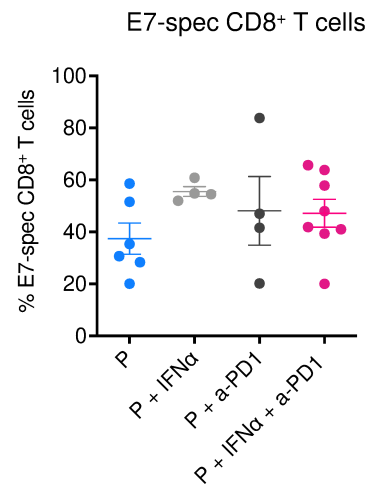

C

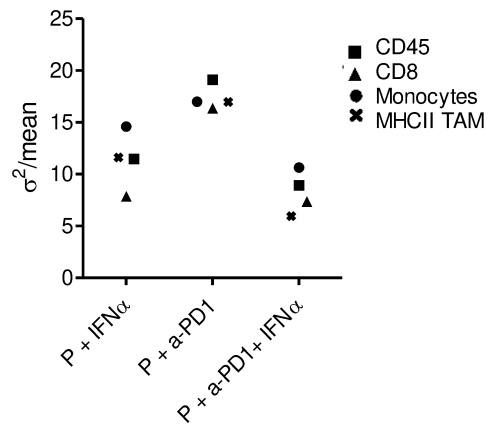

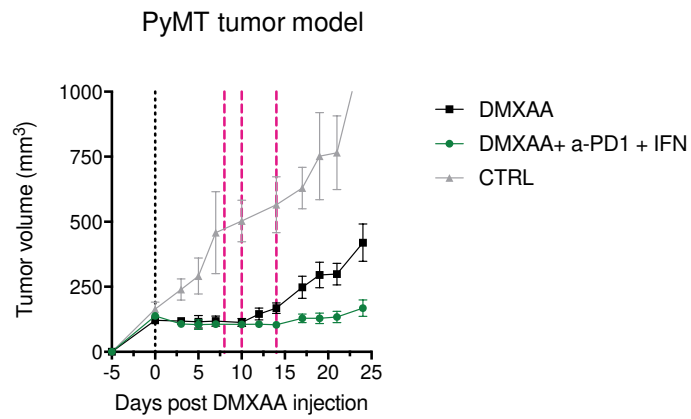

Supplement: jitc-2020-000996supp001.pdf [file jitc-2020-000996supp001.pdf]
